# Supplementary material
Source: publisher figshare collection journal article supplement (https://tandf.figshare.com/ndownloader/files/37565295)

**Supplementary information**

**
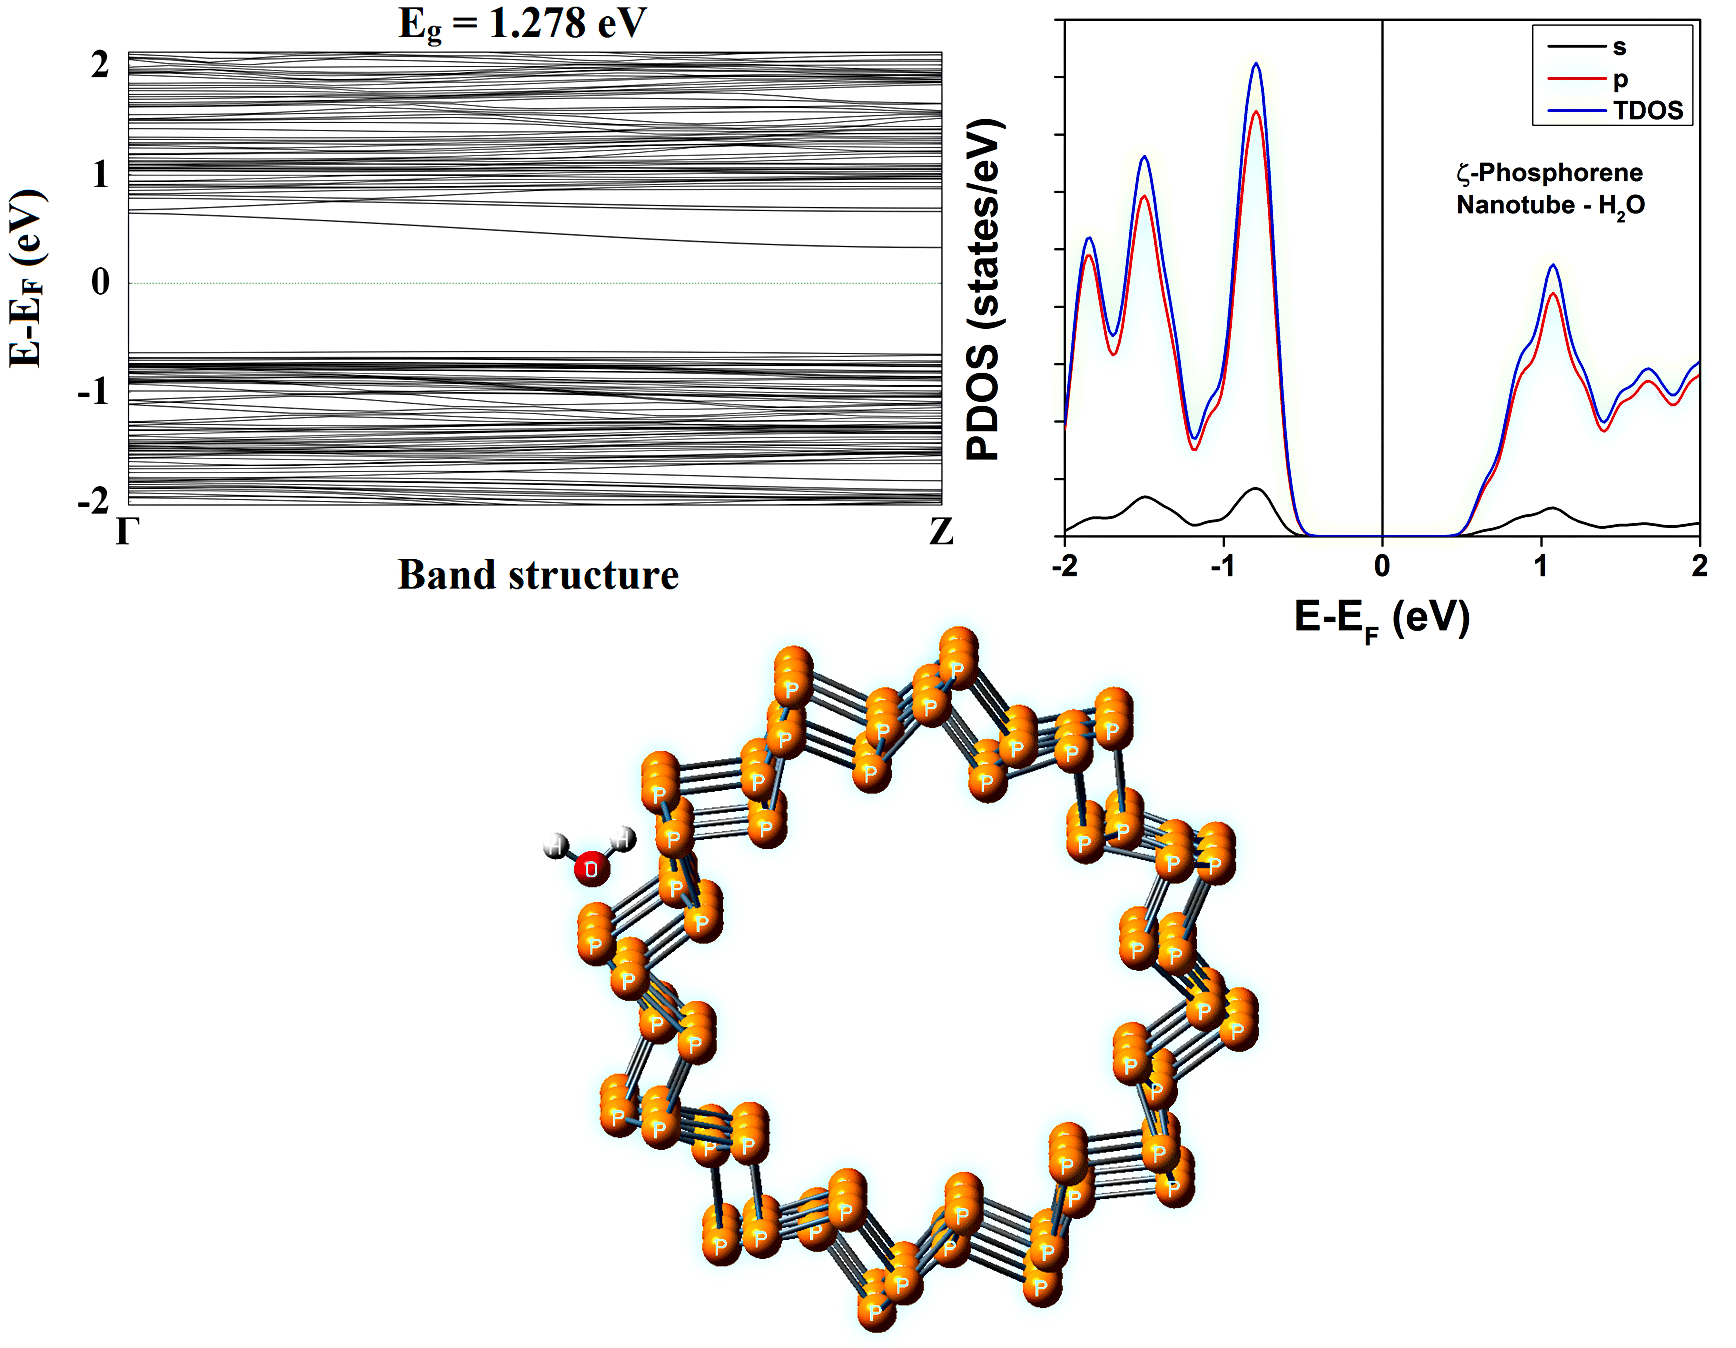
**

Supplement: Supplementary file 1 [file 37565295]
